# Supplementary material for: Intraspecific variation of residual heterozygosity and its utility for quantitative genetic studies in maize
Source: PubMed Central journal article supplement (PMC5909218; doi:10.1186/s12870-018-1287-4), 2018-04-19
Supplement: 12870_2018_1287_MOESM1_ESM.pdf [file 12870_2018_1287_MOESM1_ESM.pdf]

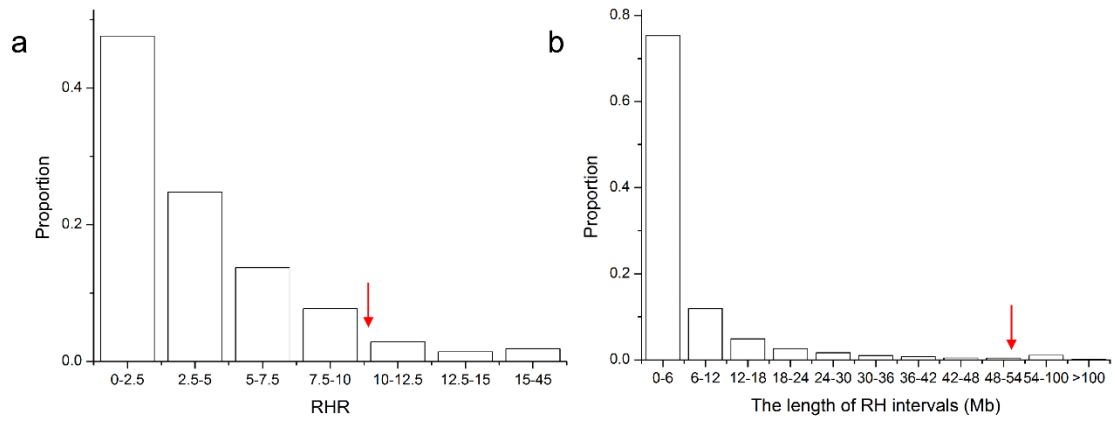

**Figure S1.** Distribution of RHR in each line in 12 populations and the RH length for all RH intervals. The red arrows mean the RHR threshold is 10% (a) and the length threshold of single RH interval was 50Mb (b).
